# Supplementary material for: On the structure and reactivity of PtnCun (n = 1–7) alloy clusters
Source: Royal Society of Chemistry journal article supplement (doi:10.1039/d1cp00379h), 2021-01-01
Supplement: d1cp00379h1.pdf [file d1cp00379h1.pdf]

## Supporting Information: ‘On the Structure and Reactivity of Pt<sub>n</sub>Cu<sub>n</sub> (*n* = 1 – 7) Alloy Clusters’

Peter L. Rodríguez-Kessler,<sup>\*a</sup> Adán R. Rodríguez-Domínguez,<sup>b</sup> and Alvaro Muñoz-Castro<sup>\*a</sup>

---

<sup>a</sup> Grupo de Química Inorgánica y Materiales Moleculares, Facultad de Ingeniería, Universidad Autónoma de Chile, El Llano Subercaseaux 2810, Santiago, Chile. E-mail: rodriguezkessler.p@gmail.com, alvaro.munoz@uautonoma.cl

<sup>b</sup> Instituto de Física, Universidad Autónoma de San Luis Potosí, San Luis Potosí 78000, México

# 1 Formulas and Definitions for the Energetic Parameters

## 1.1 Binding energy and fragmentation energy

The stability of  $Pt_nCu_n$  clusters (with  $n = 1 - 7$ ) is investigated by calculating the binding energy per atom ( $E_B$ ), fragmentation or dissociation energy ( $E_f$ ), defined as

$$E_B[Pt_nCu_n] = \{nE[Cu] + nE[Pt] - E[Pt_nCu_n]\}/2n, \quad (1)$$

$$E_f[Pt_nCu_n] = E[Pt_{n-1}Cu_{n-1}] + \{E[Pt] + E[Cu]\} - E[Pt_nCu_n], \quad (2)$$

where  $E[Cu]$ ,  $E[Pt]$ , and  $E[Pt_nCu_n]$  are the total energies of the bare Cu atom, the Pt atom, the  $Pt_nCu_n$  alloy cluster, while  $n$  denotes the number of both Cu and Pt atoms in the cluster, respectively.

## 1.2 Ionization potential and electron affinity

The vertical ionization potential (vIP) and vertical electron affinity (vEA) are calculated as follows:

$$vIP = E[Pt_nCu_n]^+ - E[Pt_nCu_n]^0, \quad (3)$$

$$vEA = E[Pt_nCu_n]^0 - E[Pt_nCu_n]^-, \quad (4)$$

in which the geometries of the neutral and charged clusters remain unchanged.

## 1.3 Chemical Hardness

The chemical hardness is approximated as

$$\eta \approx \frac{1}{2}(vIP - vEA). \quad (5)$$

## 1.4 The d-band center

The position of the d-band center  $\epsilon_d$  is calculated by the following expression:

$$\epsilon_d = \frac{\sum_i \epsilon_i * d(\epsilon_i)}{\sum_i d(\epsilon_i)}, \quad (6)$$

since the clusters studied in this work have a magnetic character, we have included the d-band center ( $\epsilon_d$ ) of the clusters for the majority ( $\epsilon_d \uparrow$ ) and minority spin states ( $\epsilon_d \downarrow$ ), respectively.
